# Supplementary material for: Behind Brain Metastases Formation: Cellular and Molecular Alterations and Blood–Brain Barrier Disruption
Source: MDPI journal article supplement (doi:10.3390/ijms22137057), 2021-06-30
Supplement: s1 [file s1]

**Table S1** | Detailed data analysis of all studied parameters.

| Figure   | Marker    | Cell type | Marker                               | Software used | Analysis                                                                                                                                                                                                                                            | Statistics                          |
|----------|-----------|-----------|--------------------------------------|---------------|-----------------------------------------------------------------------------------------------------------------------------------------------------------------------------------------------------------------------------------------------------|-------------------------------------|
| Figure 1 | β-catenin | b.End5    | Mean Intensity                       | ImageJ        | Measured the mean intensity in 500x500 pixel square.                                                                                                                                                                                                | Two-tailed student's <i>t</i> -test |
|          |           |           | Elongation                           | Icy           | 5 cells per field were circumscribed to obtain the elongation value:1 stand for a perfect circle. The higher the value, the more elongated is the cell.                                                                                             | Mann Whitney test                   |
|          | ZO-1      | b.End5    | Mean Intensity                       | ImageJ        | Measured the mean intensity in 500x500 pixel square.                                                                                                                                                                                                | Two-tailed student's <i>t</i> -test |
|          |           |           | Membrane Gaps                        | Icy           | 5 cells were selected per field. The membrane gaps on ZO-1 staining were manually counted.                                                                                                                                                          | Mann Whitney test                   |
| Figure 2 | β-catenin | b.End5    | Mean Intensity                       | ImageJ        | Measured the mean intensity in 500x500 pixel square.                                                                                                                                                                                                | One-way ANOVA                       |
|          |           |           | Membrane Intensity                   | Icy           | 5 cells per field were circumscribed and the membrane mean intensity is measured.                                                                                                                                                                   | Mann Whitney test                   |
|          |           |           | Plot Profile                         | ImageJ        | In a representative cell, a line of 5 μm was draw on top of the membrane staining and a profile of intensity was obtained in the respective interest protein channel to elucidate the intensity or presence of the protein in the membrane region.  |                                     |
|          |           | 4T1       | Cluster Number                       | Image J       | Number of clusters (≥ <b>3 cells</b> ) was quantified manually.                                                                                                                                                                                     | One-way ANOVA                       |
|          |           |           | Cluster Area                         |               | Measured the area of circumscribed clusters (≥ <b>3 cells</b> ).                                                                                                                                                                                    | One-way ANOVA                       |
| Figure 3 | ZO-1      | b.End5    | Plot Profile                         | ImageJ        | In a representative cell, a line of 13 μm was draw on top of the membrane staining and a profile of intensity was obtained in the respective interest protein channel to elucidate the intensity or presence of the protein in the membrane region. | <del>One-way ANOVA</del>            |
|          |           |           | Membrane Gaps                        | Icy           | 5 cells were selected per field.<br>The membrane gaps on ZO-1 staining were manually counted.                                                                                                                                                       | Mann Whitney test                   |
| Figure 4 | Cav-1     | b.End5    | Mean Intensity                       | ImageJ        | Measured the mean intensity in 500x500 pixel square.                                                                                                                                                                                                | One-way ANOVA                       |
|          |           |           |                                      | Icy           | Spot detector in 5 representative cells per field was performed to identify the number of caveolae.                                                                                                                                                 | Mann Whitney test                   |
| Figure 6 | MLCK      | b.End5    | Mean Intensity                       | ImageJ        | Measured the mean intensity in 500x500 pixel square.                                                                                                                                                                                                | One-way ANOVA                       |
|          |           |           | Cytoplasmic Total Intensity (at 6 h) | Icy           | 5 cells per field were circumscribed and the mean intensity of the entire cell was measured, as well as the cell nuclei. The values of mean intensity were multiplied by its respective area, to obtain the total intensity of cells                | Mann Whitney test                   |

|          |             |               |                                       |        |                                                                                                                                                                                                                                            |                                           |
|----------|-------------|---------------|---------------------------------------|--------|--------------------------------------------------------------------------------------------------------------------------------------------------------------------------------------------------------------------------------------------|-------------------------------------------|
| Figure 7 |             |               |                                       |        | and the respective nuclei, and the cytoplasmic content was quantified by the difference between total cell intensity and total nuclear intensity.                                                                                          |                                           |
|          |             |               | Nuclear Total Intensity (at 6 h)      |        | 5 cells per field were circumscribed and the mean intensity of the entire cell was measured, as well as the cell nuclei. The values of mean intensity were multiplied by its respective area, to obtain the total intensity of the nuclei. | <u>Two-tailed student's <i>t</i>-test</u> |
|          | p-MLC       | <b>b.End5</b> | Cell elongation                       | Icy    | 5 cells per field were circumscribed to obtain the elongation value:1 stand for a perfect circle. The higher the value, the more elongated is the cell.                                                                                    | Two-tailed student's <i>t</i> -test       |
|          | FAK         |               | Plot Profile                          |        | In a representative cell, a line of 33 µm was drawn through the cell and a profile of intensity was obtained for both nuclei and protein channel, in order to be able to identify the localization of the protein along the cell.          |                                           |
|          | β4-integrin | <b>b.End5</b> | Mean Intensity                        |        |                                                                                                                                                                                                                                            | One-way ANOVA                             |
|          |             |               | Number of cells with Nuclear Staining | ImageJ | Measured the mean intensity in 500x500 pixel square.<br>Number of b.End5 in proximity to 4T1 cells with nuclear β4-integrin were counted.                                                                                                  | One-way ANOVA                             |
|          | β4-integrin |               | Mean Intensity                        | ImageJ | Measured the mean intensity circumscribed cell or cluster ( <b>≥ 3 cells</b> ).                                                                                                                                                            | One-way ANOVA                             |
|          |             | <b>4T1</b>    | Number of cells forming invadopodia   |        | The number of 4T1 cells forming invadopodium (cytoplasmatic protrusions) was measured and divided by the total number of 4T1 cells per field. Data was shown as a percentage.                                                              | Kruskal-Wallis test                       |
